# Supplementary material for: The preparation of HfC/C ceramics via molecular design
Source: Royal Society of Chemistry journal article supplement (doi:10.1039/c0dt01817a), 2011-01-01
Supplement: c0dt01817a.pdf [file c0dt01817a.pdf]

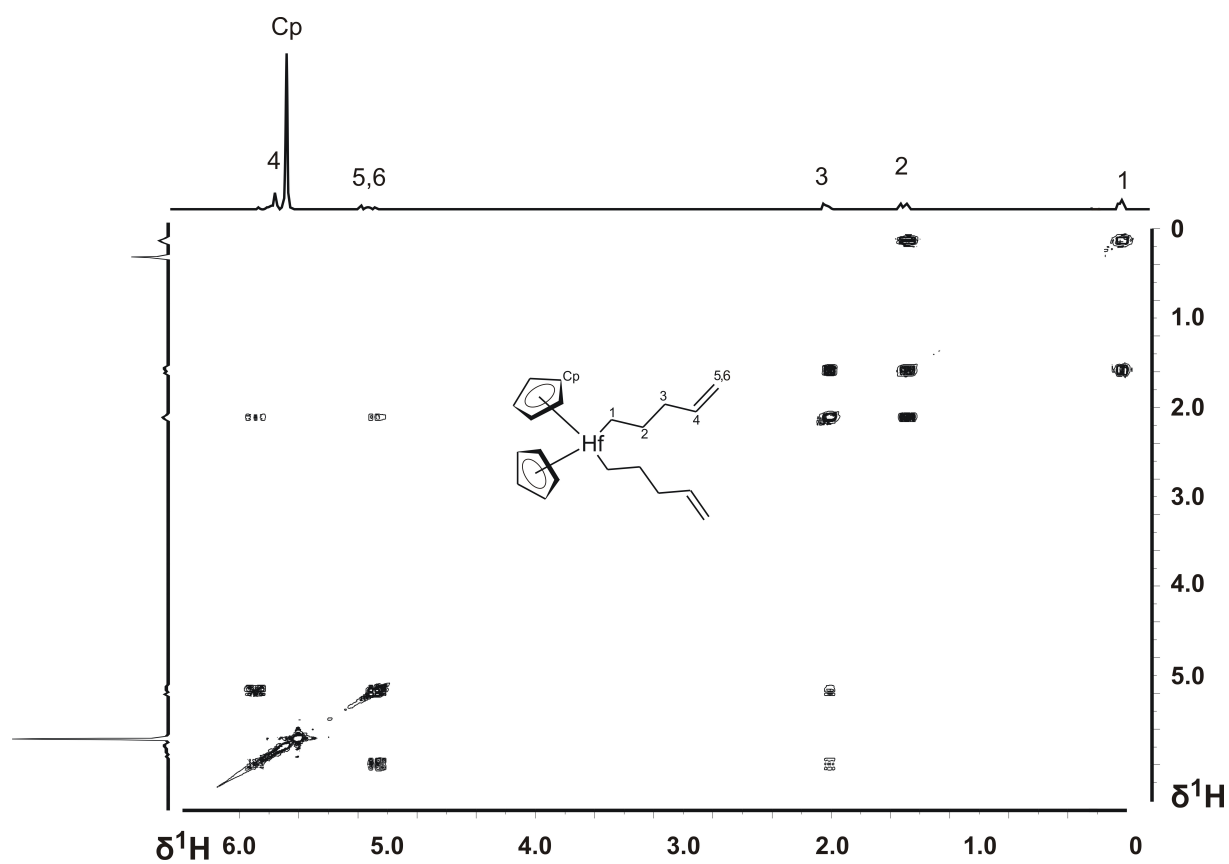

Figure 1:  $^1\text{H}, ^1\text{H}$  COSY NMR spectrum of compound  $\text{Cp}_2\text{Hf}[(\text{CH}_2)_3\text{CH}=\text{CH}_2]_2$  (r.t.,  $\text{C}_6\text{D}_6$ )

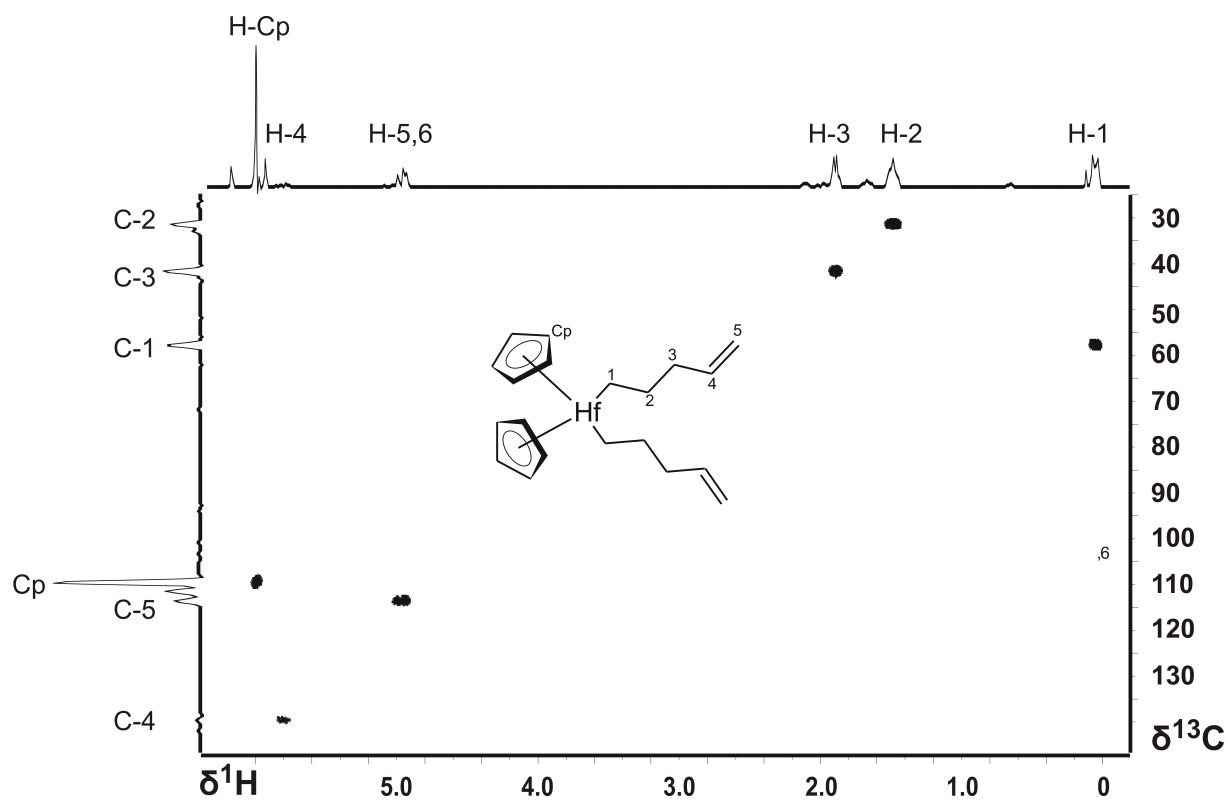

Figure 2:  $^{13}\text{C}, ^1\text{H}$  HSQC NMR spectrum of compound  $\text{Cp}_2\text{Hf}[(\text{CH}_2)_3\text{CH}=\text{CH}_2]_2$  (r.t.,  $\text{CDCl}_3$ )

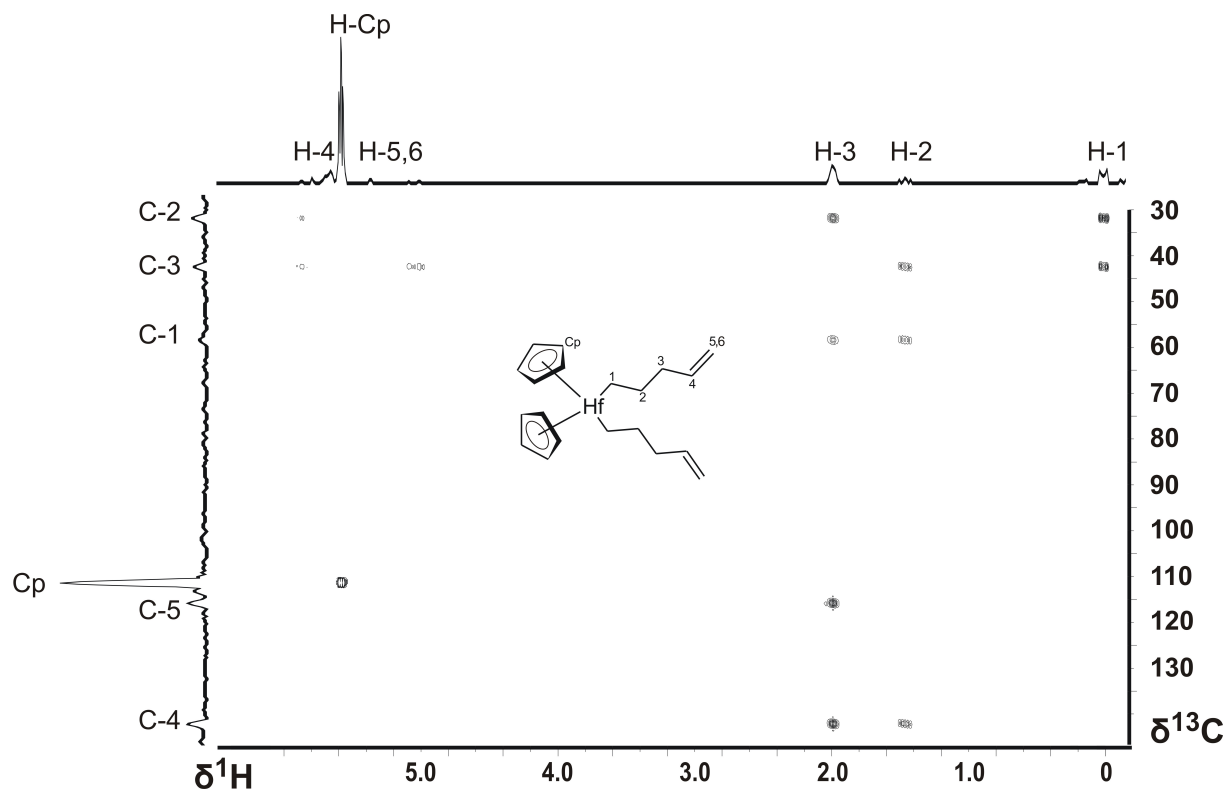

Figure 3:  $^{13}\text{C}, ^1\text{H}$  HMBC NMR spectrum of compound  $\text{Cp}_2\text{Hf}[(\text{CH}_2)_3\text{CH}=\text{CH}_2]_2$  (r.t.,  $\text{C}_6\text{D}_6$ )
